# Supplementary material
Source: ML conference proceedings conference paper supplement (https://proceedings.mlr.press/v108/zeng20a.html)
Supplement: Supplementary file 1 [file zeng20a-supp.zip]

## Supplementary Material

### A. Missing Proof of Proposition 3.2

Recall that for each iteration  $t$ , we update the  $i$ th coordinate  $x_i$  if  $t \in \mathcal{T}^i$ . Specifically,

$$x_i(t+1) = \begin{cases} G_i(\hat{\mathbf{x}}(t)), & t \in \mathcal{T}^i; \\ x_i(t), & t \notin \mathcal{T}^i, \end{cases} \quad (1)$$

where  $\hat{\mathbf{x}}(t) := [x_1(\tau_1(t)), \dots, x_n(\tau_n(t))]^\top$ . For analysis, we sort  $\mathcal{T}^i$  into a sequence  $(t_k^i)_{k \geq 0}$ , where  $t_0^i$  is the first element of  $\mathcal{T}^i$  and  $t_k^i$  is the  $(k+1)$ th. Then Theorem A.1 bounds  $|x_i(t) - x_i^*|$  in a staircase decreasing way:  $|x_i(t) - x_i^*|$  will contract when  $t \in \mathcal{T}^i$ , or equivalently,  $t = t_k^i$  for some  $k$ .

**Theorem A.1** (Staircase Decreasing). *Consider the iteration (1) under Assumption 3.1. Suppose that  $G$  is  $\gamma$ -contractive under infinity norm and  $\mathbf{x}^*$  is the fixed-point of  $G$ . For each  $t \geq B_1$  and  $i \in \{1, 2, \dots, n\}$ , if  $t \in (t_k^i, t_{k+1}^i]$  for some  $k$ , then  $x_i(t)$  satisfies*

$$|x_i(t) - x_i^*| \leq \|\mathbf{x}(0) - \mathbf{x}^*\|_\infty \rho^{t_k^i - B_1}, \quad (2)$$

where  $\rho := \gamma^{\frac{1}{B_1 + B_2 - 1}}$ .

**Proof.** We first claim that for each  $t \geq B_1$  and  $i \in \{1, 2, \dots, n\}$ , there exists some  $k \geq 0$  such that  $t \in (t_k^i, t_{k+1}^i]$ . This follows from Assumption 3.1 (a), where  $t_0^i \leq B_1 - 1, \forall i$ .

Now we prove Eq. (2) by induction. One could check

$$\|\mathbf{x}(t) - \mathbf{x}^*\|_\infty \leq \|\mathbf{x}(0) - \mathbf{x}^*\|_\infty, \quad \forall t \geq 0$$

as a corollary of [1, Theorem 2] or by another induction. We skip the details here. Thus for the basic case,

$$\max_{0 \leq t \leq B_1} \{\|\mathbf{x}(t) - \mathbf{x}^*\|_\infty \rho^{-t}\} \leq \max_{0 \leq t \leq B_1} \{\|\mathbf{x}(0) - \mathbf{x}^*\|_\infty \rho^{-t}\} \leq \|\mathbf{x}(0) - \mathbf{x}^*\|_\infty \rho^{-B_1},$$

which gives that for each  $t \leq B_1$  and  $i \in \{1, 2, \dots, n\}$ ,

$$|x_i(t) - x_i^*| \leq \|\mathbf{x}(0) - \mathbf{x}^*\|_\infty \rho^{t - B_1}.$$

Since  $\rho^t$  is decreasing, we can further obtain that

$$|x_i(B_1) - x_i^*| \leq \|\mathbf{x}(0) - \mathbf{x}^*\|_\infty \rho^{t_k^i - B_1},$$

if  $B_1 \in (t_k^i, t_{k+1}^i]$  for some  $k$ .

For the induction step, we assume that Eq. (2) holds for all  $t \geq B_1$  up to some  $t'$ . For a fixed  $i \in \{1, 2, \dots, n\}$ , supposing that  $t' \in (t_{k'}^i, t_{k'+1}^i]$  for some  $k'$ , then we analyze the scenario at  $(t' + 1)$  as two cases.

**Case 1:**  $t' \notin \mathcal{T}^i$ , i.e., we do not update coordinate  $i$  at iteration  $t'$ . Hence,  $x_i(t' + 1) = x_i(t')$  and  $t' + 1 \in (t_{k'}^i, t_{k'+1}^i]$ . Then Eq. (2) follows directly.

**Case 2:**  $t' \in \mathcal{T}^i$ , i.e., the  $i$ th coordinate is updated at iteration  $t'$  and  $t' = t_{k'+1}^i$ . Since  $G$  is  $\gamma$ -contractive under infinity norm, we have

$$\begin{aligned} |x_i(t' + 1) - x_i^*| &= |G_i(\hat{\mathbf{x}}(t')) - x_i^*| \leq \|G(\hat{\mathbf{x}}(t')) - \mathbf{x}^*\|_\infty \\ &\leq \gamma \max_j |x_j(\tau_j(t')) - x_j^*|. \end{aligned} \quad (3)$$

For a fixed  $j \in \{1, 2, \dots, n\}$ , suppose that  $\tau_j(t') \in (t_{k_\tau}^j, t_{k_\tau+1}^j]$  for some  $k_\tau$ . Then the induction hypothesis gives  $|x_j(\tau_j(t')) - x_j^*| \leq \|\mathbf{x}(0) - \mathbf{x}^*\|_\infty \rho^{t_{k_\tau}^j - B_1}$ . Since  $\tau_j(t') \leq t_{k_\tau}^j + B_1$  by Assumption 3.1 (a) and  $\tau_j(t') \geq t' - B_2 + 1$  by Assumption 3.1 (b), we obtain

$$\begin{aligned} \gamma |x_j(\tau_j(t')) - x_j^*| &\leq \gamma \|\mathbf{x}(0) - \mathbf{x}^*\|_\infty \rho^{t_{k_\tau}^j - B_1} \\ &\leq \gamma \|\mathbf{x}(0) - \mathbf{x}^*\|_\infty \rho^{\tau_j(t') - 2B_1} \\ &\leq \gamma \|\mathbf{x}(0) - \mathbf{x}^*\|_\infty \rho^{t' - 2B_1 - B_2 - 1} \\ &= \|\mathbf{x}(0) - \mathbf{x}^*\|_\infty \rho^{t_{k'+1}^i - B_1}, \end{aligned} \quad (4)$$

where the equality holds since  $\gamma = \rho^{B_1+B_2-1}$  by definition and  $t' = t_{k'+1}^i$ . Notice that  $t' + 1 \in (t_{k'+1}^i, t_{k'+2}^i]$ . Inserting Eq. (4) back into Eq. (3) yields the desired result.  $\square$

One may note that if  $t \in (t_k^i, t_{k+1}^i]$ , then  $t_k^i + B_1 \geq t$  by Assumption 3.1 (a). Hence, Proposition 3.2 is a direct consequence of Theorem A.1.

## B. Missing Proof from Section 4.1

To analyze the sampling error, we first review Hoeffding's Inequality [2].

**Lemma B.1** (Hoeffding's Inequality [2]). *Let  $X_1, \dots, X_m$  be i.i.d real valued random variables with  $X_j \in [a_j, b_j]$  and  $Y = \frac{1}{m} \sum_{j=1}^m X_j$ . For all  $\varepsilon \geq 0$ ,*

$$\mathbb{P}[|Y - \mathbb{E}[Y]| \geq \varepsilon] \leq 2e^{\frac{-2m^2\varepsilon^2}{\sum_{j=1}^m (b_j - a_j)^2}}.$$

By Hoeffding's Inequality, the error between the sample averages and the true expectations can be controlled with enough number of samples. Specifically, we have:

**Lemma B.2.** *Given a constant  $L$ , with  $K = \lceil \frac{8}{(1-\gamma)^4 \varepsilon^2} \log(\frac{4L}{\delta}) \rceil$  samples, AsyncQVI returns  $r(t)$  and  $S(\hat{\mathbf{Q}}(t))$  satisfying*

$$|r(t) - \bar{r}_{i_t}^{a_t}| \leq \frac{(1-\gamma)^2 \varepsilon}{4}, \quad |S(\hat{\mathbf{Q}}(t)) - \mathbf{p}_{i_t}^{a_t \top} \hat{\mathbf{v}}(t)| \leq \frac{(1-\gamma) \varepsilon}{4}$$

with probability at least  $1 - \frac{\delta}{L}$ .

**Proof.** As we explained before, both  $r(t)$  and  $S(\hat{\mathbf{Q}}(t))$  are averages of  $K$  i.i.d. samples with  $\mathbb{E}[r(t)] = \sum_j p_{i_t j}^{a_t} r_{i_t j}^{a_t} := \bar{r}_{i_t}^{a_t}$  and  $\mathbb{E}[S(\hat{\mathbf{Q}}(t))] = \sum_j p_{i_t j}^{a_t} \hat{v}_j(t) := \mathbf{p}_{i_t}^{a_t \top} \hat{\mathbf{v}}(t)$ . Since we assume  $r_{ij}^a \in [0, 1]$ , it is easy to verify  $0 \leq \hat{\mathbf{v}}(t) \leq \frac{1}{1-\gamma}$  by induction. We skip the details here. Then letting  $K = \lceil \frac{8}{(1-\gamma)^4 \varepsilon^2} \log(\frac{4L}{\delta}) \rceil$ , we can obtain that

$$\begin{aligned} \mathbb{P}\left[|r(t) - \bar{r}_{i_t}^{a_t}| \geq \frac{(1-\gamma)^2 \varepsilon}{4}\right] &\leq 2e^{\frac{-2K^2(1-\gamma)^4 \varepsilon^2}{16K}} \leq \frac{\delta}{2L}; \\ \mathbb{P}\left[|S(\hat{\mathbf{Q}}(t)) - \mathbf{p}_{i_t}^{a_t \top} \hat{\mathbf{v}}(t)| \geq \frac{(1-\gamma) \varepsilon}{4}\right] &\leq 2e^{\frac{-2K^2(1-\gamma)^4 \varepsilon^2}{16K}} \leq \frac{\delta}{2L}. \end{aligned}$$

$\square$

**Proof.** [Proof of Proposition 4.3] For a fixed iteration  $t$ , by Lemma B.2,

$$|r(t) + \gamma S(\hat{\mathbf{Q}}(t)) - \bar{r}_{i_t}^{a_t} - \gamma \mathbf{p}_{i_t}^{a_t \top} \hat{\mathbf{v}}(t)| \leq |r(t) - \bar{r}_{i_t}^{a_t}| + \gamma |S(\hat{\mathbf{Q}}(t)) - \mathbf{p}_{i_t}^{a_t \top} \hat{\mathbf{v}}(t)| \leq \frac{(1-\gamma) \varepsilon}{4}$$

holds with probability at least  $1 - \frac{\delta}{L}$ . Taking a union bound over all  $0 \leq t \leq L - 1$  iterations gives the desired result.  $\square$

**Proof.** [Proof of Proposition 4.4] We denote by  $\mathcal{E}_1$  the event

$$\left\{ \left| r(t) + \gamma S(\hat{\mathbf{Q}}(t)) - \bar{r}_{it}^{at} - \gamma \mathbf{p}_{it}^{at \top} \hat{\mathbf{v}}(t) \right| \leq \frac{(1-\gamma)\varepsilon}{4}, \forall 0 \leq t \leq L-1 \right\}.$$

By Proposition 4.3,  $\mathcal{E}_1$  occurs with probability at least  $1 - \delta$ . Next, we condition on  $\mathcal{E}_1$  and prove

$$\|\mathbf{Q}(t) - \mathbf{Q}^{\mathbb{E}}(t)\|_{\infty} \leq \frac{\varepsilon}{2}, \forall 1 \leq t \leq L \quad (5)$$

by induction. The basic case is trivial. For the induction step, we analyze the scenario at  $t+1$  as two cases. When  $t \notin \mathcal{T}^{i,a}$ ,  $|Q_{i,a}(t+1) - Q_{i,a}^{\mathbb{E}}(t+1)| \leq \varepsilon/2$  follows from the hypothesis, since Eqs. (5) and (6) give that

$$Q_{i,a}(t+1) - Q_{i,a}^{\mathbb{E}}(t+1) = Q_{i,a}(t) - Q_{i,a}^{\mathbb{E}}(t).$$

When  $t \in \mathcal{T}^{i,a}$ , by Eq. (5), Eq. (6) and triangle inequality, we have that

$$\begin{aligned} & |Q_{i,a}(t+1) - Q_{i,a}^{\mathbb{E}}(t+1)| \\ &= \left| r(t) + \gamma S(\hat{\mathbf{Q}}(t)) - \frac{(1-\gamma)\varepsilon}{4} - \bar{r}_i^a - \gamma \sum_j p_{ij}^a \max_{a'} \hat{Q}_{j,a'}^{\mathbb{E}}(t) \right| \\ &\leq \left| r(t) + \gamma S(\hat{\mathbf{Q}}(t)) - \bar{r}_i^a - \gamma \mathbf{p}_i^{a \top} \hat{\mathbf{v}}(t) - \frac{(1-\gamma)\varepsilon}{4} \right| + \left| \gamma \mathbf{p}_i^{a \top} \hat{\mathbf{v}}(t) - \gamma \sum_j p_{ij}^a \max_{a'} \hat{Q}_{j,a'}^{\mathbb{E}}(t) \right| \\ &\leq \left| r(t) + \gamma S(\hat{\mathbf{Q}}(t)) - \bar{r}_i^a - \gamma \mathbf{p}_i^{a \top} \hat{\mathbf{v}}(t) \right| + \frac{(1-\gamma)\varepsilon}{4} + \gamma \sum_j p_{ij}^a \left| \max_{a'} \hat{Q}_{j,a'}(t) - \max_{a'} \hat{Q}_{j,a'}^{\mathbb{E}}(t) \right|. \end{aligned}$$

By definition of  $\mathcal{E}_1$  and the induction hypothesis, we further obtain that

$$|Q_{i,a}(t+1) - Q_{i,a}^{\mathbb{E}}(t+1)| \leq \frac{(1-\gamma)\varepsilon}{4} + \frac{(1-\gamma)\varepsilon}{4} + \gamma \frac{\varepsilon}{2} = \frac{\varepsilon}{2},$$

which completes the proof.  $\square$

**Proof.** [Proof of Theorem 4.5] By Proposition 3.2,

$$\|\mathbf{Q}^* - \mathbf{Q}^{\mathbb{E}}(L)\|_{\infty} \leq (1-\gamma)^{-1} \rho^{L-2B_1} = (1-\gamma)^{-1} \gamma^{\frac{L-2B_1}{B_1+B_2-1}}.$$

Notice that  $\gamma = (1 - (1-\gamma)) \leq e^{-(1-\gamma)}$ . We have that

$$\|\mathbf{Q}^* - \mathbf{Q}^{\mathbb{E}}(L)\|_{\infty} \leq (1-\gamma)^{-1} e^{-(1-\gamma) \frac{L-2B_1}{B_1+B_2-1}} \leq \frac{\varepsilon}{2}, \quad (6)$$

where the last inequality holds with  $L = \lceil 2B_1 + \frac{B_1+B_2-1}{1-\gamma} \log\left(\frac{2}{(1-\gamma)\varepsilon}\right) \rceil$ . Then, by Proposition 4.4, with probability at least  $1 - \delta$ ,

$$\|\mathbf{Q}^{\mathbb{E}}(L) - \mathbf{Q}(L)\|_{\infty} \leq \frac{\varepsilon}{2}. \quad (7)$$

Inserting Eq. (7) back into Eq. (6) gives the desired result

$$\|\mathbf{Q}^* - \mathbf{Q}(L)\|_{\infty} \leq \|\mathbf{Q}^* - \mathbf{Q}^{\mathbb{E}}(L)\|_{\infty} + \|\mathbf{Q}^{\mathbb{E}}(L) - \mathbf{Q}(L)\|_{\infty} \leq \varepsilon.$$

Then one can check  $\|\mathbf{v}^* - \mathbf{v}(L)\|_{\infty} \leq \varepsilon$  at ease.  $\square$

### C. Missing Proof of Theorem 4.6

After  $L$  iterations, AsyncQVI returns a policy  $\pi(L)$  with  $\pi_i(L) = \arg \max_{a \in \mathcal{A}} Q_{i,a}(L)$ . To show that  $\pi(L)$  is  $\varepsilon$ -optimal, we first define a policy operator.

**Definition C.1** (Policy Operator). *Given a policy  $\pi$  and a vector  $\mathbf{v} \in \mathbb{R}^{|\mathcal{S}|}$ , the policy operator  $T_\pi: \mathbb{R}^{|\mathcal{S}|} \rightarrow \mathbb{R}^{|\mathcal{S}|}$  is defined as*

$$[T_\pi \mathbf{v}]_i = \bar{r}_i^{\pi_i} + \gamma \mathbf{p}_i^{\pi_i \top} \mathbf{v} = r_i^{\pi_i} + \gamma \sum_{j \in \mathcal{S}} p_{ij}^{\pi_i} v_j. \quad (8)$$

**Proposition C.2** ( $T_\pi$ 's Properties). *Given a policy  $\pi$ , for any vectors  $\mathbf{v}, \mathbf{v}' \in \mathbb{R}^{\mathcal{S}}$ ,*

- (a) **Monotonicity:** *if  $\mathbf{v} \leq \mathbf{v}'$ , then  $T_\pi \mathbf{v} \leq T_\pi \mathbf{v}'$ .*
- (b)  **$\gamma$ -Contraction:**  $\|T_\pi \mathbf{v} - T_\pi \mathbf{v}'\|_\infty \leq \gamma \|\mathbf{v} - \mathbf{v}'\|_\infty$ .
- (c)  $\mathbf{v}^\pi$  *is the fixed-point of  $T_\pi$ .*

The proof is straightforward following the definition. We skip the details here.

**Lemma C.3.** [3] *Given a policy  $\pi$ , for any vector  $\mathbf{v} \in \mathbb{R}^{\mathcal{S}}$ , if there exists a  $\mathbf{v}' \in \mathbb{R}^{\mathcal{S}}$  such that  $\mathbf{v}' \leq \mathbf{v}$  and  $\mathbf{v} \leq T_\pi \mathbf{v}'$ , then  $\mathbf{v} \leq \mathbf{v}^\pi$ .*

**Proof.** By Proposition C.2 (a) and  $\mathbf{v}' \leq \mathbf{v}$ , we first have  $T_\pi \mathbf{v}' \leq T_\pi \mathbf{v}$ . Combining with  $\mathbf{v} \leq T_\pi \mathbf{v}'$ , we further obtain  $\mathbf{v} \leq T_\pi \mathbf{v}$ . By induction, one can check  $\mathbf{v} \leq T_\pi^n \mathbf{v}, \forall n \in \mathbb{N}$ . Moreover, since  $T_\pi$  is a  $\gamma$ -contraction,  $\mathbf{v}^\pi = \lim_{n \rightarrow \infty} T_\pi^n \mathbf{v}$ . Hence,  $\mathbf{v} \leq \lim_{n \rightarrow \infty} T_\pi^n \mathbf{v} = \mathbf{v}^\pi$ .  $\square$

Next, we consider the special case that  $\mathbf{v}(L)$  and  $\pi(L)$  are both derived from AsyncQVI with

$$\pi_i(L) = \arg \max_a Q_{i,a}(L), \quad v_i(L) = \max_a Q_{i,a}(L), \quad \forall i \in \mathcal{S}.$$

If  $\|\mathbf{v}^* - \mathbf{v}^\pi\|_\infty \leq \varepsilon$ , then  $\pi$  is  $\varepsilon$ -optimal. To achieve this, we first show that  $\mathbf{v}(L)$  satisfies Lemma C.3 (see Lemma C.4). Then with Theorem 4.5,  $\|\mathbf{v}^* - \mathbf{v}^\pi\|_\infty \leq \|\mathbf{v}^* - \mathbf{v}(L)\|_\infty \leq \varepsilon$ .

**Lemma C.4.** *Under Assumption 3.1, AsyncQVI generates a sequence of  $\{\mathbf{v}(t)\}_{t=1}^L$  and  $\{\pi(t)\}_{t=1}^L$  satisfying*

$$\mathbf{v}(t-1) \leq \mathbf{v}(t) \leq T_{\pi(t)} \mathbf{v}(t-1), \quad \forall 1 \leq t \leq L \quad (9)$$

*with probability at least  $1 - \delta$ .*

**Proof.** By Proposition 4.3,

$$|r(t) + \gamma S(\hat{\mathbf{Q}}(t)) - \bar{r}_{it}^{a_t} - \gamma \mathbf{p}_{it}^{a_t \top} \hat{\mathbf{v}}(t)| \leq \frac{(1-\gamma)\varepsilon}{4}, \quad \forall 0 \leq t \leq L-1$$

holds with probability at least  $1 - \delta$ . Denote by  $\mathcal{E}_2$  the event

$$\left\{ r(t) + \gamma S(\hat{\mathbf{Q}}(t)) - \frac{(1-\gamma)\varepsilon}{4} \leq \bar{r}_{it}^{a_t} + \gamma \mathbf{p}_{it}^{a_t \top} \hat{\mathbf{v}}(t), \quad \forall 0 \leq t \leq L-1 \right\}.$$

Then  $\mathcal{E}_2$  occurs with probability at least  $1 - \delta$ .

Now we condition on  $\mathcal{E}_2$  and prove Eq. (9) by induction. For simplicity, we let  $\mathbf{v}(-1) = \mathbf{v}(0) = \mathbf{0}$  and start our proof from  $t = 0$ . Then the basic case holds. For the induction step, suppose that Eq. (9) is true for all  $t$  up to some  $t'$ . Recall that in AsyncQVI, for each iteration, whether  $v_i$  or  $\pi_i$  will be updates depends on the value of  $Q_{i,a}$ . We hence analyze the scenario at  $(t' + 1)$  as two cases.

**Case 1:**  $Q_{i_{t'}, a_{t'}}(t' + 1) \leq v_{i_{t'}}(t')$ . Then  $\mathbf{v}$  and  $\pi$  will not be updated, i.e.,  $\mathbf{v}(t' + 1) = \mathbf{v}(t')$  and  $\pi(t' + 1) = \pi(t')$ . In this case, the inequality  $\mathbf{v}(t') \leq \mathbf{v}(t' + 1)$  follows directly. For the other part, by induction hypothesis we have

$$\mathbf{v}(t' + 1) = \mathbf{v}(t') \leq T_{\pi(t')} \mathbf{v}(t' - 1) = T_{\pi(t'+1)} \mathbf{v}(t' - 1) \leq T_{\pi(t'+1)} \mathbf{v}(t'),$$

where the last inequality comes from  $\mathbf{v}(t' - 1) \leq \mathbf{v}(t')$  and the monotonicity of  $T_{\pi(t'+1)}$ .

**Case 2:**  $Q_{i_{t'}, a_{t'}}(t' + 1) > v_{i_{t'}}(t')$ . Then  $\forall i \in \mathcal{S}$ ,

**Case 2.1:**  $i \neq i_{t'}$ . In this case,  $v_i(t' + 1) = v_i(t')$  and  $\pi_i(t' + 1) = \pi_i(t')$ . Hence, once again by induction hypothesis and  $T_\pi$ 's monotonicity, we obtain

$$v_i(t' + 1) = v_i(t') \leq [T_{\pi(t')} \mathbf{v}(t' - 1)]_i = [T_{\pi(t'+1)} \mathbf{v}(t' - 1)]_i \leq [T_{\pi(t'+1)} \mathbf{v}(t') ]_i.$$

**Case 2.2:**  $i = i_{t'}$ . According to Lines 8 and 10 of Algorithm 2, the  $i$ th coordinate of  $\mathbf{v}$  is updated at iteration  $t'$  and the former inequality follows directly. For the latter inequality, by Line 7 of Algorithm 2 we have

$$v_i(t' + 1) = Q_{i, a_{t'}}(t' + 1) = r(t') + \gamma S(\hat{\mathbf{Q}}(t')) - \frac{(1 - \gamma)\varepsilon}{4}.$$

By definition of  $\mathcal{E}_2$  and  $\pi_i(t' + 1) = a_{t'}$ , we obtain

$$v_i(t' + 1) \leq \bar{r}_i^{a_{t'}} + \gamma \mathbf{p}_i^{a_{t'}}^\top \hat{\mathbf{v}}(t') = [T_{\pi(t'+1)} \hat{\mathbf{v}}(t')]_i.$$

Owing to  $\hat{\mathbf{v}}(t') \leq \mathbf{v}(t')$  by induction hypothesis and the monotonicity of  $T_{\pi(t'+1)}$ , we can complete our proof by

$$v_i(t' + 1) \leq [T_{\pi(t'+1)} \hat{\mathbf{v}}(t')]_i \leq [T_{\pi(t'+1)} \mathbf{v}(t')]_i.$$

□

Finally, combining the results of Lemma C.3, Lemma C.4 and Theorem 4.5, we can establish Theorem 4.6 at ease.

## References

- [1] Hamid Reza Feyzmahdavian and Mikael Johansson. On the convergence rates of asynchronous iterations. In *Decision and Control (CDC), 2014 IEEE 53rd Annual Conference on*, pages 153–159. IEEE, 2014.
- [2] Wassily Hoeffding. Probability inequalities for sums of bounded random variables. *Journal of the American statistical association*, 58(301):13–30, 1963.
- [3] Aaron Sidford, Mengdi Wang, Xian Wu, and Yinyu Ye. Variance reduced value iteration and faster algorithms for solving markov decision processes. In *Proceedings of the Twenty-Ninth Annual ACM-SIAM Symposium on Discrete Algorithms*, pages 770–787. Society for Industrial and Applied Mathematics, 2018.
